# Supplementary material
Source: PubMed Central journal article supplement (PMC4968548)
Supplement: AEM.01106-16_zam999117330so1.pdf [file AEM.01106-16_zam999117330so1.pdf]

# Supplementary Material

for

## Ammonia as an in-situ sanitizer: influence of virus genome type on inactivation.

Loïc Decrey<sup>a</sup>, Shinobu Kazama<sup>a,b</sup>, and Tamar Kohn<sup>a\*</sup>

<sup>a</sup>*Laboratory of Environmental Chemistry, School of Architecture, Civil and Environmental Engineering (ENAC), École Polytechnique Fédérale de Lausanne (EPFL), CH-1015 Lausanne, Switzerland*

<sup>b</sup>*New Industry Creation Hatchery Center (NICHe), Tohoku University Hatchery Square 303, 6-6-04, Aoba, Aramaki, Aoba-ku, Sendai, Miyagi, 980-0879, Japan*

\*Corresponding author

phone: +41 (0)21 693 0891; fax: +41 (0)21 693 8070;

e-mail: tamar.kohn@epfl.ch

Number of pages : 9

Number of figures : 3

Number of tables : 5

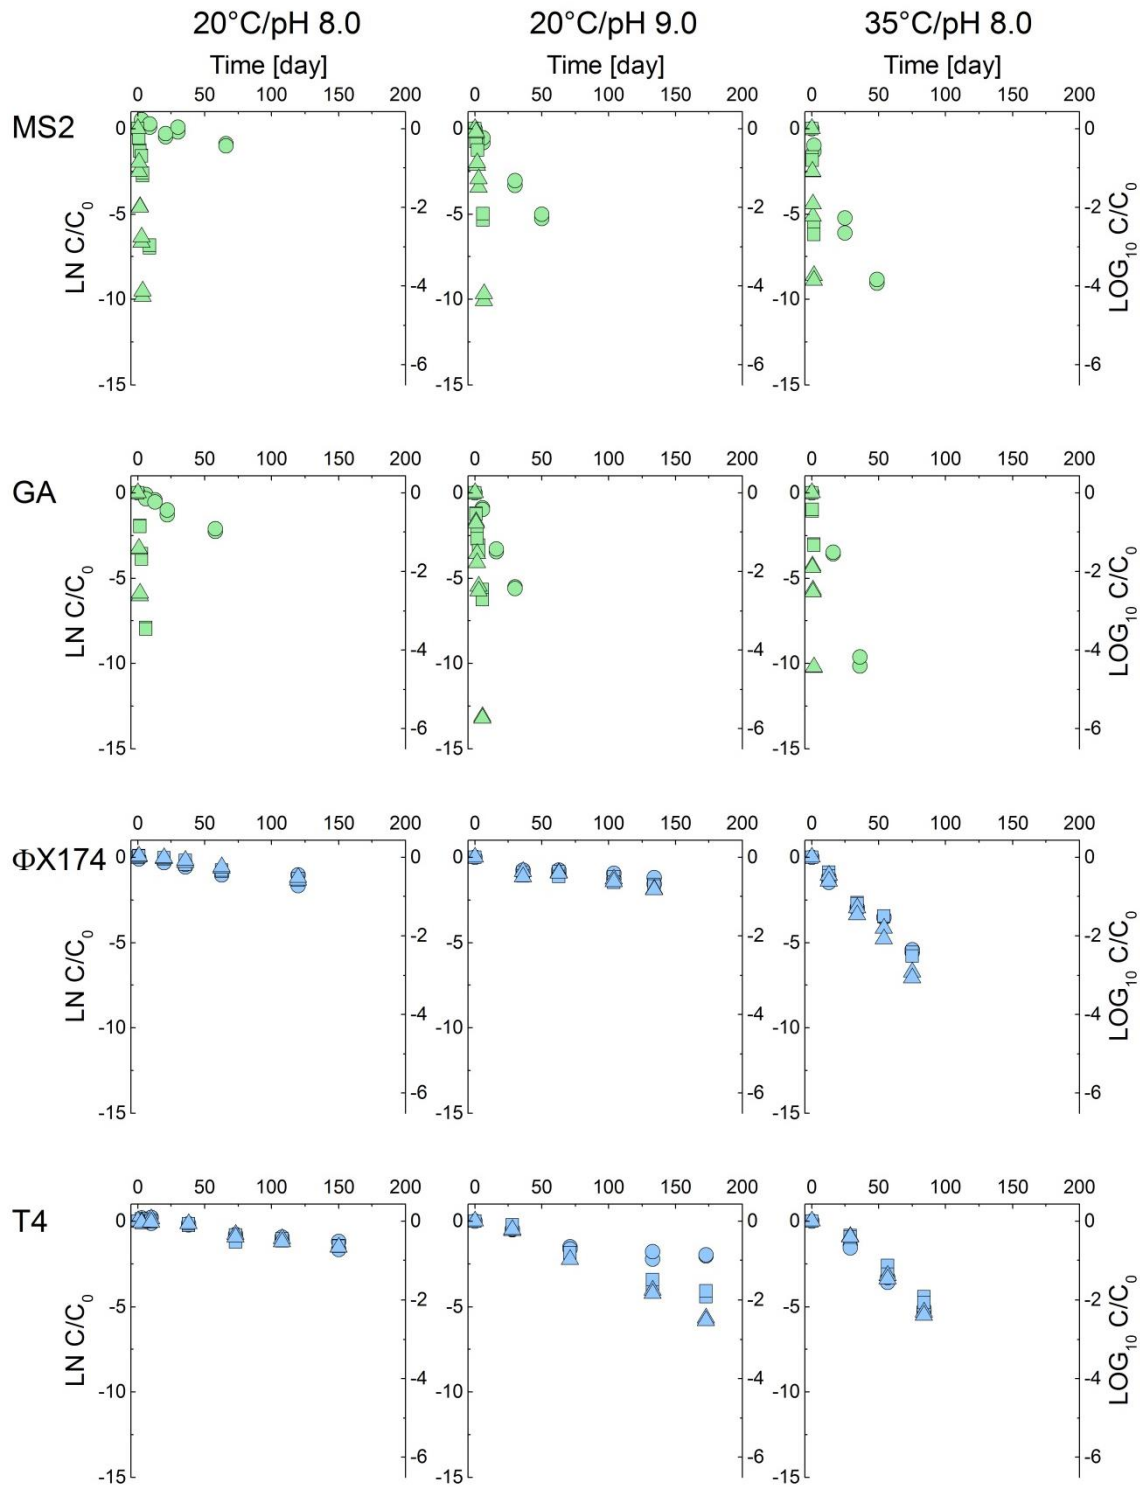

**FIG S1** Kinetics of phage inactivation. Circles, squares and triangles represent PCa and AmCa with an approximate  $\{NH_3(aq)\}$  of 0, 20 and 40 mmol L<sup>-1</sup> respectively. The actual, measured  $\{NH_3(aq)\}$  is listed in Table S1.

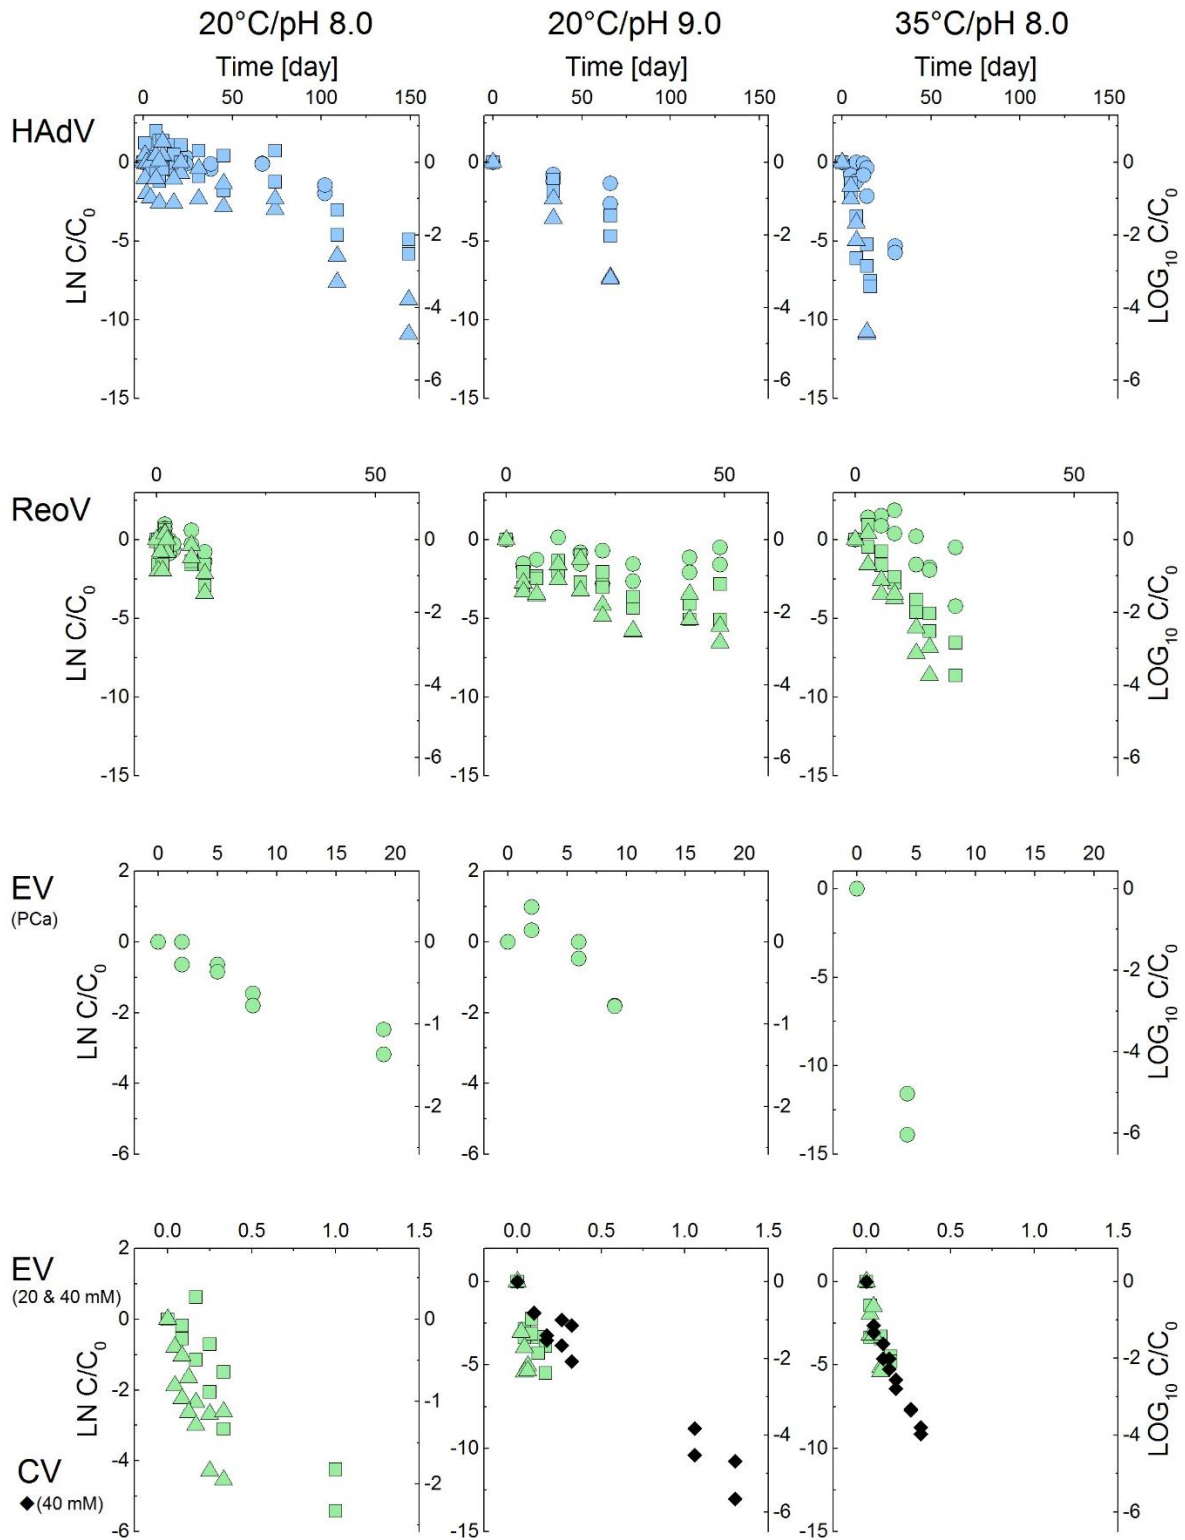

**FIG S2 Kinetics of mammalian virus inactivation.** Circles, squares and triangles represent PCa and AmCa with an approximate  $\{\text{NH}_3(\text{aq})\}$  of 0, 20 and 40  $\text{mmol L}^{-1}$  respectively. The actual, measured  $\{\text{NH}_3(\text{aq})\}$  is listed in Table S1.

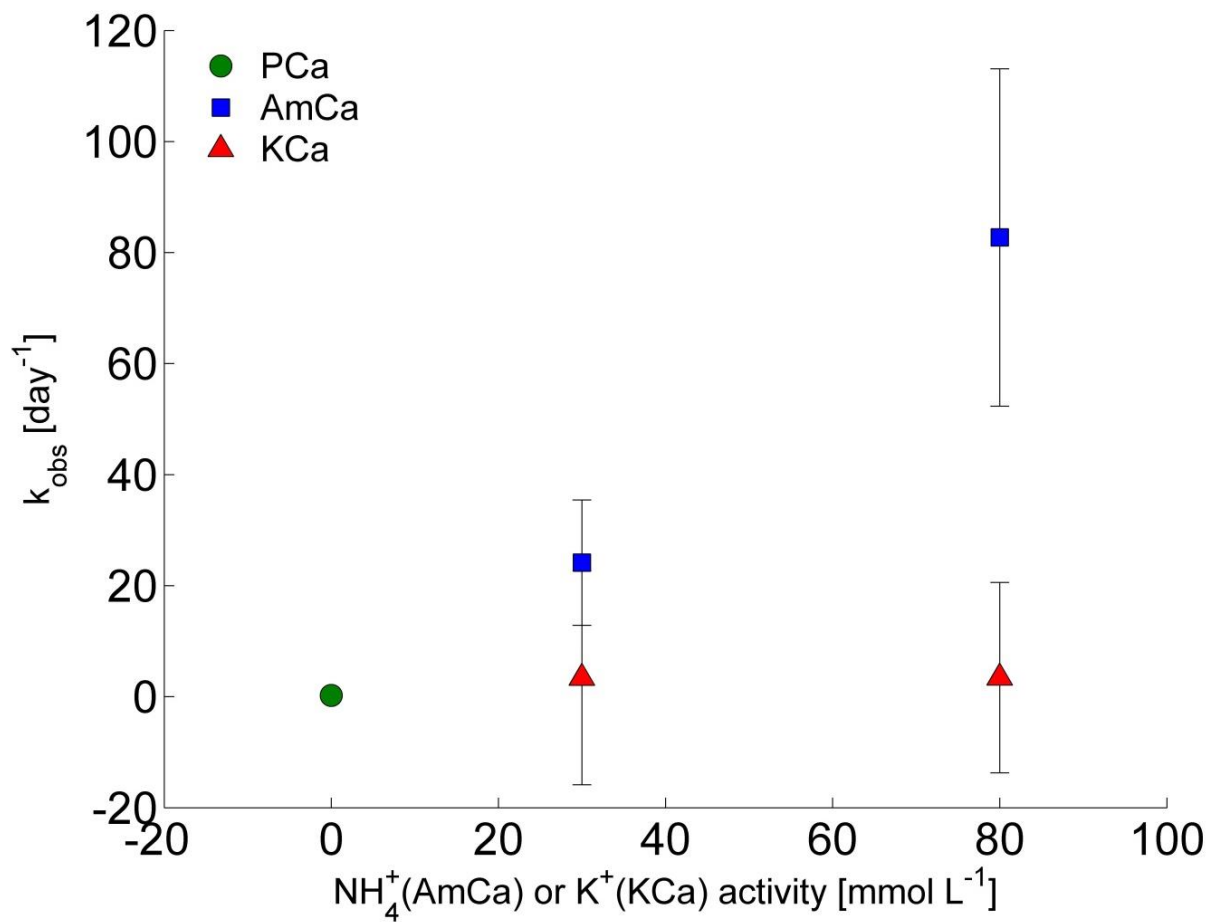

FIG S3. Influence of  $\text{NH}_4^+$  and  $\text{K}^+$  activity on EV inactivation at pH 9/20°C. The influence of  $\text{NH}_4^+$  and  $\text{K}^+$  activity were examined in AmCa and KCa buffer, respectively. The error bars depict the 95% confidence intervals associated with  $k_{\text{obs}}$ .

TABLE S1 Composition of working solutions.

| T    |                      | pH <sup>a</sup> | EC<br>[mS cm <sup>-1</sup> ] | Buffer composition (added substances)                                   |                                                            |                                                            |                                                                                             |                                             |                                              |                                              | {NH <sub>3</sub> (aq)} <sup>e</sup><br>[mmol L <sup>-1</sup> ] |                                             |
|------|----------------------|-----------------|------------------------------|-------------------------------------------------------------------------|------------------------------------------------------------|------------------------------------------------------------|---------------------------------------------------------------------------------------------|---------------------------------------------|----------------------------------------------|----------------------------------------------|----------------------------------------------------------------|---------------------------------------------|
|      |                      |                 |                              | Na <sub>2</sub> CO <sub>3</sub> <sup>c</sup><br>[mmol L <sup>-1</sup> ] | NaHCO <sub>3</sub> <sup>c</sup><br>[mmol L <sup>-1</sup> ] | NH <sub>4</sub> Cl <sup>b</sup><br>[mmol L <sup>-1</sup> ] | NaH <sub>2</sub> PO <sub>4</sub> *2H <sub>2</sub> O <sup>c</sup><br>[mmol L <sup>-1</sup> ] | HCl <sup>c</sup><br>[mmol L <sup>-1</sup> ] | NaOH <sup>c</sup><br>[mmol L <sup>-1</sup> ] | NaCl <sup>c</sup><br>[mmol L <sup>-1</sup> ] |                                                                | KCl <sup>c</sup><br>[mmol L <sup>-1</sup> ] |
| 20°C | PCa                  | 7.86            | 10.4                         | 50.0                                                                    |                                                            |                                                            | 60.0                                                                                        |                                             | 5.7                                          |                                              |                                                                | 0.0                                         |
|      | PCaH                 | 7.87            | 127.0                        | 50.0                                                                    |                                                            |                                                            | 60.0                                                                                        |                                             | 12.0                                         | 1770.0                                       |                                                                | 0.0                                         |
|      | AmCa 20              | 8.03            | 91.6                         | 50.0                                                                    |                                                            | 920.4                                                      |                                                                                             | 26.3                                        |                                              |                                              |                                                                | 22.7                                        |
|      | AmCa 40              | 7.95            | 174.2                        | 50.0                                                                    |                                                            | 1976.8                                                     |                                                                                             |                                             | 4.9                                          |                                              |                                                                | 37.6                                        |
| 20°C | PCa                  | 8.86            |                              | 50.0                                                                    |                                                            |                                                            | 45.0                                                                                        |                                             | 1.0                                          |                                              |                                                                | 0.0                                         |
|      | AmCa 20 <sup>d</sup> | 8.93            |                              | 50.0                                                                    |                                                            | 54.9                                                       |                                                                                             | 23.5                                        |                                              |                                              |                                                                | 10.8                                        |
|      | AmCa 40 <sup>d</sup> | 8.94            |                              | 50.0                                                                    |                                                            | 147.0                                                      |                                                                                             | 1.2                                         |                                              |                                              |                                                                | 28.4                                        |
|      | KCa 30 <sup>d</sup>  | 9.00            |                              | 50.0                                                                    |                                                            |                                                            |                                                                                             | 44.3                                        |                                              |                                              | 44.0                                                           | 0.0                                         |
|      | KCa 80 <sup>d</sup>  | 9.00            |                              | 50.0                                                                    |                                                            |                                                            |                                                                                             | 43.8                                        |                                              |                                              | 113.0                                                          | 0.0                                         |
| 35°C | PCa                  | 7.92            |                              | 50.0                                                                    |                                                            |                                                            | 60.0                                                                                        |                                             | 7.0                                          |                                              |                                                                | 0.0                                         |
|      | AmCa 20              | 7.98            |                              | 50.0                                                                    |                                                            | 295.1                                                      |                                                                                             | 28.1                                        |                                              |                                              |                                                                | 19.5                                        |
|      | AmCa 40              | 8.03            |                              | 50.0                                                                    |                                                            | 652.9                                                      |                                                                                             | 5.6                                         |                                              |                                              |                                                                | 44.3                                        |
| 50°C | PCa                  | 8.00            |                              | 50.0                                                                    |                                                            |                                                            | 60.0                                                                                        |                                             | 8.8                                          |                                              |                                                                | 0.0                                         |
| 60°C | PCa                  | 8.00            |                              | 50.0                                                                    |                                                            |                                                            | 60.0                                                                                        |                                             | 10.6                                         |                                              |                                                                | 0.0                                         |
| 20°C |                      | 10.00           | 0.45                         | 4.5                                                                     | 5.5                                                        |                                                            |                                                                                             |                                             |                                              | 10.0                                         |                                                                | 0.0                                         |
| 20°C |                      | 11.00           | 0.57                         | 9.8                                                                     | 0.2                                                        |                                                            |                                                                                             |                                             |                                              | 10.0                                         |                                                                | 0.0                                         |
| 20°C |                      | 11.50           | 0.65                         |                                                                         |                                                            |                                                            | 10.0                                                                                        |                                             | 15.1                                         | 10.0                                         |                                                                | 0.0                                         |
| 20°C |                      | 12.00           | 0.95                         |                                                                         |                                                            |                                                            | 10.0                                                                                        |                                             | 24.0                                         | 10.0                                         |                                                                | 0.0                                         |

<sup>a</sup> Measured at experimental temperature.

<sup>b</sup> Total ammonia measured by IC (see experimental method).

<sup>c</sup> Concentration determined from the amount of the compound added at the beginning of the experiment. The concentration was calculated with PHREEQC (Pitzer database), see material and methods.

<sup>d</sup> Correspond respectively to NH<sub>4</sub><sup>+</sup> activity of 30 and 80 mM and K<sup>+</sup> activity of 30 and 80 mM.

<sup>e</sup> NH<sub>3</sub> activities determined from the buffer composition (see material and method).

**TABLE S2 Kinetic parameters associated with phage inactivation:  $k_{obs}$  and coefficient of determination ( $R^2$ ).**

| Phage   | pH   | T    |         | $k_{obs}$<br>[day <sup>-1</sup> ] | IC 95% | $R^2$  |
|---------|------|------|---------|-----------------------------------|--------|--------|
| MS2     | 8    | 20°C | PCa     | 0.02                              | 0.01   | 0.75   |
|         |      |      | PCaH    | 0.11                              | 0.01   | 0.98   |
|         |      |      | AmCa 20 | 0.78                              | 0.05   | 0.99   |
|         |      |      | AmCa 40 | 2.50                              | 0.23   | 0.99   |
|         | 9    | 20°C | PCa     | 0.10                              | 0.01   | 0.99   |
|         |      |      | AmCa 20 | 0.86                              | 0.11   | 0.98   |
|         |      |      | AmCa 40 | 1.47                              | 0.14   | 0.99   |
|         | 8    | 35°C | PCa     | 0.18                              | 0.03   | 0.98   |
|         |      |      | AmCa 20 | 3.18                              | 0.32   | 0.99   |
|         |      |      | AmCa 40 | 5.32                              | 0.58   | 0.99   |
|         | 8    | 50°C | PCa     | 5.51                              | 0.34   | 0.99   |
|         |      |      | 60°C    | PCa                               | 294.01 | 42.69  |
|         | 10   | 20°C |         | 0.44                              | 0.06   | 0.98   |
|         | 11   | 20°C |         | 5.16                              | 0.23   | 0.99   |
|         | 11.5 | 20°C |         | 37.76                             | 4.12   | 0.98   |
| 12      | 20°C |      | 11623   | 5384                              | 0.99   |        |
| GA      | 8    | 20°C | PCa     | 0.04                              | 0.01   | 0.96   |
|         |      |      | PCaH    | 0.14                              | 0.01   | 0.99   |
|         |      |      | AmCa 20 | 1.35                              | 0.13   | 0.99   |
|         |      |      | AmCa 40 | 3.33                              | 0.08   | 0.99   |
|         | 9    | 20°C | PCa     | 0.19                              | 0.02   | 0.99   |
|         |      |      | AmCa 20 | 1.02                              | 0.11   | 0.98   |
|         |      |      | AmCa 40 | 2.30                              | 0.14   | 0.99   |
|         | 8    | 35°C | PCa     | 0.28                              | 0.04   | 0.99   |
|         |      |      | AmCa 20 | 1.84                              | 0.19   | 0.99   |
|         |      |      | AmCa 40 | 6.10                              | 0.22   | 0.99   |
| PhiX174 | 8    | 20°C | PCa     | 0.0114                            | 0.0029 | 0.88   |
|         |      |      | PCaH    | 0.0115                            | 0.0012 | 0.98   |
|         |      |      | AmCa 20 | 0.0117                            | 0.0016 | 0.96   |
|         |      |      | AmCa 40 | 0.0110                            | 0.0013 | 0.97   |
|         | 9    | 20°C | PCa     | 0.0088                            | 0.0034 | 0.81   |
|         |      |      | AmCa 20 | 0.0108                            | 0.0044 | 0.79   |
|         |      |      | AmCa 40 | 0.0124                            | 0.0044 | 0.84   |
|         | 8    | 35°C | PCa     | 0.0686                            | 0.0094 | 0.97   |
|         |      |      | AmCa 20 | 0.0726                            | 0.0078 | 0.98   |
|         |      |      | AmCa 40 | 0.0893                            | 0.0085 | 0.99   |
|         | 8    | 50°C | PCa     | 1.1280                            | 0.1548 | 0.97   |
|         |      |      | 60°C    | PCa                               | 265.62 | 26.25  |
|         | 11   | 20°C |         | 0.0101                            | 0.0068 | 0.67   |
|         | 12   | 20°C |         | 0.0669                            | 0.0128 | 0.93   |
|         | T4   | 8    | 20°C    | PCa                               | 0.0104 | 0.0018 |
| PCaH    |      |      |         | 0.0079                            | 0.0023 | 0.83   |
| AmCa 20 |      |      |         | 0.0106                            | 0.0018 | 0.93   |
| AmCa 40 |      |      |         | 0.0108                            | 0.0014 | 0.96   |
| 9       |      | 20°C | PCa     | 0.0119                            | 0.0038 | 0.86   |
|         |      |      | AmCa 20 | 0.0263                            | 0.0030 | 0.98   |
|         |      |      | AmCa 40 | 0.0336                            | 0.0021 | 0.99   |
| 8       |      | 35°C | PCa     | 0.0628                            | 0.0049 | 0.99   |
|         |      |      | AmCa 20 | 0.0560                            | 0.0097 | 0.97   |
|         |      |      | AmCa 40 | 0.0663                            | 0.0118 | 0.97   |
| 8       |      | 50°C | PCa     | 0.8331                            | 0.0883 | 0.98   |
| 8       |      | 60°C | PCa     | 196.93                            | 35.54  | 0.95   |
| 10      |      | 20°C |         | 0.0315                            | 0.0067 | 0.93   |
| 11      |      | 20°C |         | 0.9625                            | 0.1295 | 0.99   |
| 11.5    |      | 20°C |         | 22198                             | 14815  | 0.98   |

**TABLE S3 Kinetic parameters associated with mammalian virus inactivation:  $k_{obs}$  and coefficient of determination ( $R^2$ ).**

| Virus   | pH      | T    |         | $k_{obs}$<br>[day <sup>-1</sup> ] | IC 95%  | $R^2$ |      |
|---------|---------|------|---------|-----------------------------------|---------|-------|------|
| HAdV    | 8       | 20°C | PCa     | 0.018                             | 0.008   | 0.62  |      |
|         |         |      | PCaH    | 0.003 *                           | 0.007   | 0.04  |      |
|         |         |      | AmCa 20 | 0.037                             | 0.009   | 0.71  |      |
|         |         |      | AmCa 40 | 0.060                             | 0.011   | 0.83  |      |
|         | 9       | 20°C | PCa     | 0.030                             | 0.019   | 0.80  |      |
|         |         |      | AmCa 20 | 0.061                             | 0.025   | 0.91  |      |
|         |         |      | AmCa 40 | 0.111                             | 0.026   | 0.97  |      |
|         | 8       | 35°C | PCa     | 0.185                             | 0.056   | 0.81  |      |
|         |         |      | AmCa 20 | 0.468                             | 0.120   | 0.90  |      |
|         |         |      | AmCa 40 | 0.786                             | 0.205   | 0.94  |      |
|         | ReoV    | 8    | 20°C    | PCa                               | 0.040 * | 0.123 | 0.04 |
|         |         |      |         | PCaH                              | 0.048 * | 0.124 | 0.05 |
| AmCa 20 |         |      |         | 0.186                             | 0.103   | 0.52  |      |
| AmCa 40 |         |      |         | 0.174                             | 0.131   | 0.37  |      |
| 9       |         | 20°C | PCa     | 0.015 *                           | 0.028   | 0.09  |      |
|         |         |      | AmCa 20 | 0.069                             | 0.031   | 0.59  |      |
|         |         |      | AmCa 40 | 0.089                             | 0.040   | 0.58  |      |
| 8       |         | 35°C | PCa     | 0.154                             | 0.085   | 0.56  |      |
|         |         |      | AmCa 20 | 0.352                             | 0.041   | 0.97  |      |
|         |         |      | AmCa 40 | 0.470                             | 0.067   | 0.96  |      |
| EV      |         | 8    | 20°C    | PCa                               | 0.15    | 0.03  | 0.92 |
|         |         |      |         | PCaH                              | 0.25    | 0.06  | 0.91 |
|         | AmCa 20 |      |         | 4.97                              | 1.51    | 0.84  |      |
|         | AmCa 40 |      |         | 10.24                             | 4.08    | 0.71  |      |
|         | 9       | 20°C | PCa     | 0.22                              | 0.15    | 0.66  |      |
|         |         |      | AmCa 20 | 24.15                             | 11.28   | 0.75  |      |
|         |         |      | AmCa 40 | 82.72                             | 30.38   | 0.87  |      |
|         | 8       | 35°C | PCa     | 3.00                              | 0.87    | 0.98  |      |
|         |         |      | AmCa 20 | 27.73                             | 13.98   | 0.79  |      |
|         |         |      | AmCa 40 | 57.78                             | 24.31   | 0.84  |      |
|         | CV      | 9    | 20°C    | AmCa 40                           | 8.40    | 1.19  | 0.95 |
|         |         | 8    | 35°C    | AmCa 40                           | 25.31   | 3.89  | 0.94 |

\* not significantly different from zero.

**TABLE S4 Kinetic parameters associated with virus and phage inactivation:  $k_{\text{NH}_3}$  and coefficient of determination ( $R^2$ ).**

| Phage/Virus             | pH | T    | $k_{\text{NH}_3}^b$<br>[day <sup>-1</sup> M <sup>-1</sup> ] | IC 95% | $R^2$ |
|-------------------------|----|------|-------------------------------------------------------------|--------|-------|
| MS2                     | 8  | 20°C | 63.4                                                        | 38.3   | 0.89  |
|                         | 9  | 20°C | 46.7                                                        | 16.6   | 0.96  |
|                         | 8  | 35°C | 114.8                                                       | 82.7   | 0.97  |
| GA                      | 8  | 20°C | 85.2                                                        | 35.2   | 0.95  |
|                         | 9  | 20°C | 74.3                                                        | 1.4    | 0.99  |
|                         | 8  | 35°C | 133.3                                                       | 110.8  | 0.96  |
| PhiX174                 | 8  | 20°C | -0.009 *                                                    | 0.031  | 0.20  |
|                         | 9  | 20°C | 0.122                                                       | 0.041  | 0.96  |
|                         | 8  | 35°C | 0.480 *                                                     | 1.690  | 0.93  |
| T4                      | 8  | 20°C | 0.009                                                       | 0.001  | 0.99  |
|                         | 9  | 20°C | 0.729                                                       | 0.423  | 0.90  |
|                         | 8  | 35°C | 0.090 *                                                     | 0.930  | 0.16  |
| HAdV                    | 8  | 20°C | 1.1                                                         | 0.4    | 0.97  |
|                         | 9  | 20°C | 2.9                                                         | 0.0    | 1.00  |
|                         | 8  | 35°C | 13.6                                                        | 2.1    | 0.99  |
| ReoV                    | 8  | 20°C | 3.8                                                         | 3.4    | 0.79  |
|                         | 9  | 20°C | 2.4                                                         | 1.8    | 0.85  |
|                         | 8  | 35°C | 7.0                                                         | 6.6    | 0.95  |
| EV                      | 8  | 20°C | 264.0                                                       | 66.3   | 0.98  |
|                         | 9  | 20°C | 2944.3                                                      | 519.7  | 0.99  |
|                         | 8  | 35°C | 1236.1                                                      | 72.8   | 0.99  |
| f2 <sup>a</sup>         | 8  | 20°C | 35.3                                                        | 5.4    | 0.99  |
| Poliovirus <sup>a</sup> | 8  | 20°C | 235.0                                                       | 91.3   | 0.97  |

<sup>a</sup> Determined from Burge et al. (1983) data.

<sup>b</sup> According to Eq.2 (see material and methods).

\* Not significantly different from zero.



**TABLE S5 Comparison of DNA, RNA and protein cleavage rate constants.**

|                                                                                                            |                                                                                                     |         |                      |                   |
|------------------------------------------------------------------------------------------------------------|-----------------------------------------------------------------------------------------------------|---------|----------------------|-------------------|
| <b>Spontaneous DNA hydrolysis (Gates, 2009)</b>                                                            |                                                                                                     |         |                      |                   |
| <b>A</b>                                                                                                   | <b>Spontaneous hydrolysis of phosphodiester backbone (Schroeder, 2006)</b>                          |         |                      |                   |
|                                                                                                            |                                                                                                     |         | [day <sup>-1</sup> ] |                   |
|                                                                                                            | pH 7.0                                                                                              | 25°C    | 8.64E-11             |                   |
| <b>B</b>                                                                                                   | <b>Hydrolytic deamination of DNA base --&gt; mutagenesis, no evidence of cleavage (Gates, 2009)</b> |         |                      |                   |
|                                                                                                            |                                                                                                     |         | [day <sup>-1</sup> ] |                   |
|                                                                                                            | dsDNA                                                                                               | pH 7.4  | 37°C                 | 3.79E-08          |
|                                                                                                            | ssDNA                                                                                               | pH 7.4  | 37°C                 | 9.49E-06          |
| <b>C Hydrolysis of phosphodiester backbone through abasic site (C1 and C2 are the rate limiting steps)</b> |                                                                                                     |         |                      |                   |
| <i>C1.a Depurination/depyrimidation (Lindhal, 1972 &amp; 1973) --&gt; acid-catalyzed reaction</i>          |                                                                                                     |         |                      |                   |
|                                                                                                            |                                                                                                     |         | [day <sup>-1</sup> ] |                   |
|                                                                                                            | pyrimidine (CT)                                                                                     | pH 7.4  | 37°C                 | 1.30E-07          |
|                                                                                                            | purine (AG)                                                                                         | pH 7.4  | 37°C                 | 2.59E-06          |
| <i>C1.b Depurination (An, 2014) --&gt; acid-catalyzed reaction</i>                                         |                                                                                                     |         |                      |                   |
|                                                                                                            |                                                                                                     |         | [day <sup>-1</sup> ] |                   |
|                                                                                                            | Adenine                                                                                             | pH 7.1  | 37°C                 | 1.90E-05          |
|                                                                                                            | Guanine                                                                                             | pH 7.1  | 37°C                 | 2.16E-05          |
| <i>C2 Self catalyzed (site specific) DNA depurination (Amosova, 2005)</i>                                  |                                                                                                     |         |                      |                   |
|                                                                                                            |                                                                                                     |         | [day <sup>-1</sup> ] |                   |
|                                                                                                            |                                                                                                     | pH 7.0  | 37°C                 | 1.01E-02          |
| <i>C3 Chain breakage at abasic site (alkaline-catalyzed reaction)(Gates, 2009)(Küpfer, 2007)</i>           |                                                                                                     |         |                      |                   |
|                                                                                                            |                                                                                                     |         | [day <sup>-1</sup> ] |                   |
|                                                                                                            |                                                                                                     | pH 7.4  | 37°C                 | 1.20E-02-1.25E-01 |
|                                                                                                            | in 0.1 M NaOH                                                                                       |         |                      | 2.61E+02          |
| <b>Spontaneous RNA hydrolysis (Li, 1999)</b>                                                               |                                                                                                     |         |                      |                   |
|                                                                                                            |                                                                                                     |         | [day <sup>-1</sup> ] |                   |
|                                                                                                            |                                                                                                     | pH 7.0  | 37°C                 | 1.73E-04          |
|                                                                                                            |                                                                                                     | pH 11.0 | 37°C                 | 1.48E+00          |
| <b>Spontaneous peptide bond hydrolysis (Smith, 1998)</b>                                                   |                                                                                                     |         |                      |                   |
|                                                                                                            |                                                                                                     |         | [day <sup>-1</sup> ] |                   |
|                                                                                                            |                                                                                                     | pH 7.0  | 37°C                 | 4.02E-06          |
|                                                                                                            |                                                                                                     | pH 11.0 | 37°C                 | 1.49E-04          |
| <b>Protein denaturation</b>                                                                                |                                                                                                     |         |                      |                   |
| <i>Ricin denaturation (Levy, 1950)</i>                                                                     |                                                                                                     |         |                      |                   |
|                                                                                                            |                                                                                                     |         | [day <sup>-1</sup> ] |                   |
|                                                                                                            |                                                                                                     | pH 11.0 | 37°C                 | 5.97E-01          |
| <i>Penicillin Acylase denaturation (Guranda, 2004)</i>                                                     |                                                                                                     |         |                      |                   |
|                                                                                                            |                                                                                                     |         | [day <sup>-1</sup> ] |                   |
|                                                                                                            |                                                                                                     | pH 11.0 | 37°C                 | 4.67E+03          |

(1–12)

## References

1. **Burge WD, Cramer WN, Kawata K.** 1983. Effect of Heat on Virus Inactivation by Ammonia. *Appl Environ Microbiol* **46**:446–451.
2. **Schroeder GK, Lad C, Wyman P, Williams NH, Wolfenden R.** 2006. The time required for water attack at the phosphorus atom of simple phosphodiester and of DNA. *Proc Natl Acad Sci U S A* **103**:4052–4055.
3. **Gates KS.** 2009. An overview of chemical processes that damage cellular DNA: spontaneous hydrolysis, alkylation, and reactions with radicals. *Chem Res Toxicol* **22**:1747–60.
4. **Lindahl T, Nyberg B.** 1972. Rate of depurination of native deoxyribonucleic acid. *Biochemistry* **11**:3610–3618.
5. **Lindahl T, Karlström O.** 1973. Heat-induced depyrimidination of deoxyribonucleic acid in neutral solution. *Biochemistry* **12**:5151–5154.
6. **An R, Jia Y, Wan B, Zhang Y, Dong P, Li J, Liang X.** 2014. Non-enzymatic depurination of nucleic acids: factors and mechanisms. *PLoS One* **9**:e115950.
7. **Amosova O, Coulter R, Fresco JR.** 2006. Self-catalyzed site-specific depurination of guanine residues within gene sequences. *Proc Natl Acad Sci U S A* **103**:4392–4397.
8. **Küpfer PA, Leumann CJ.** 2007. The chemical stability of abasic RNA compared to abasic DNA. *Nucleic Acids Res* **35**:58–68.
9. **Li Y, Breaker RR.** 1999. Kinetics of RNA Degradation by Specific Base Catalysis of Transesterification Involving the 2'-Hydroxyl Group. *J Am Chem Soc* **121**:5364–5372.
10. **Smith RM, Hansen DE.** 1998. The pH-Rate Profile for the Hydrolysis of a Peptide Bond. *J Am Chem Soc* **120**:8910–8913.
11. **Levy M, Benaglia AE.** 1950. The influence of temperature and pH upon the rate of denaturation of ricin. *J Biol Chem* **186**:829–47.
12. **Guranda DT, Volovik TS, Švedas VK.** 2004. pH stability of penicillin acylase from *Escherichia coli*. *Biochem* **69**:1386–1390.
